# Supplementary material for: Serum Nonesterified Fatty Acids and Incident Stroke: The CHS
Source: PubMed Central journal article supplement — J Am Heart Assoc. 2021 Nov 10;10(22):e022725. doi: 10.1161/JAHA.121.022725 (PMC8751910; doi:10.1161/jaha.121.022725), 2021-11-10
Supplement: JAH3-10-e022725-s001.pdf [file JAH3-10-e022725-s001.pdf]

# **SUPPLEMENTAL MATERIAL**

**Table S1.** Mean and standard deviation (S.D.) and median (interquartile range, IQR) for individual non-esterified fatty acids in the Cardiovascular Health Study participants, 1996-1997

| NEFA, $\mu\text{mol/L}$                  | Mean $\pm$ SD (Range)        | Median (IQR)     |
|------------------------------------------|------------------------------|------------------|
| <b>SFA</b>                               | 199 $\pm$ 62.7 (57.4-652)    | 191 (155-235)    |
| Lauric acid, 12:0                        | 2.69 $\pm$ 2.79 (0.03-34.3)  | 2.06 (1.38-3.09) |
| Myristic acid, 14:0                      | 8.97 $\pm$ 4.04 (1.13-41.5)  | 8.17 (6.14-11.0) |
| Pentadecylic acid, 15:0                  | 1.61 $\pm$ 0.53 (0.51-6.55)  | 1.53 (1.24-1.88) |
| Palmitic acid, 16:0                      | 124 $\pm$ 44.5 (26.2-498)    | 118 (93.1-149)   |
| Stearic acid, 18:0                       | 60.1 $\pm$ 17.1 (13.4-183.8) | 58.1 (48.4-69.0) |
| Arachidic acid, 20:0                     | 0.72 $\pm$ 0.37 (0.18-5.01)  | 0.62 (0.51-0.81) |
| Behenic acid, 22:0                       | 0.43 $\pm$ 0.18 (0.11-2.76)  | 0.39 (0.33-0.48) |
| Lignoceric acid, 24:0                    | 0.67 $\pm$ 0.63 (0.09-24.2)  | 0.61 (0.50-0.74) |
| <b>MUFA</b>                              | 183 $\pm$ 79.5 (26.2-577)    | 171 (125-229)    |
| Myristoleic acid, 14:1n-5                | 0.87 $\pm$ 0.64 (0.05-5.00)  | 0.69 (0.43-1.14) |
| <i>cis</i> -7-hexadecenoic acid, 16:1n-9 | 2.00 $\pm$ 0.86 (0.45-6.18)  | 1.85 (1.37-2.45) |
| Palmitoleic acid, 16:1n-7                | 16.1 $\pm$ 11.2 (1.18-99.5)  | 13.7 (8.64-21.4) |
| Oleic acid, 18:1n-9                      | 150.2 $\pm$ 63.0 (21.6-471)  | 142 (104-188)    |
| <i>cis</i> -Vaccenic acid, 18:1n-7       | 11.4 $\pm$ 5.51 (1.92-45.5)  | 10.3 (7.42-14.4) |
| Gondoic acid, 20:1n-9                    | 1.03 $\pm$ 0.48 (0.15-4.33)  | 0.94 (0.69-1.28) |
| Erucic acid, 22:1n-9                     | 0.38 $\pm$ 0.21 (0.04-3.21)  | 0.33 (0.24-0.44) |
| Nervonic acid, 24:1n-9                   | 0.35 $\pm$ 0.18 (0.06-4.41)  | 0.33 (0.27-0.39) |
| <b>n-6 PUFA</b>                          | 87.7 $\pm$ 35.1 (16.0-265)   | 82.0 (62.0-109)  |
| Linoleic acid, 18:2n-6                   | 78.8 $\pm$ 32.6 (13.0-247)   | 73.5 (55.2-98.3) |

|                                                     |                             |                  |
|-----------------------------------------------------|-----------------------------|------------------|
| $\gamma$ -Linolenic acid, 18:3n-6                   | 0.56 $\pm$ 0.31 (0.07-3.02) | 0.49 (0.34-0.71) |
| Dihomolinoleic acid, 20:2n-6                        | 0.90 $\pm$ 0.44 (0.11-6.38) | 0.82 (0.60-1.11) |
| Dihomo- $\gamma$ -Linolenic acid, 20:3n-6           | 0.96 $\pm$ 0.70 (0.15-7.97) | 0.79 (0.57-1.12) |
| Arachidonic acid, 20:4n-6                           | 5.35 $\pm$ 2.96 (1.14-26.5) | 4.68 (3.53-6.28) |
| Adrenic acid, 22:4n-6                               | 0.71 $\pm$ 0.51 (0.09-6.99) | 0.60 (0.42-0.86) |
| Docosapentaenoic acid, 22:5n-6                      | 0.38 $\pm$ 0.21 (0.06-2.31) | 0.33 (0.25-0.45) |
| <b>n-3 PUFA</b>                                     | 11.6 $\pm$ 4.63 (2.71-38.3) | 10.7 (8.26-14.1) |
| Alpha Linolenic acid (ALA), 18:3n-3                 | 5.76 $\pm$ 2.91 (0.68-22.8) | 5.19 (3.67-7.22) |
| Stearidonic acid (SDA), 18:4n-3                     | 2.14 $\pm$ 1.07 (0.17-8.41) | 1.93 (1.40-2.63) |
| Eicosapentaenoic acid (EPA), 20:5n-3                | 0.37 $\pm$ 0.30 (0.00-2.94) | 0.29 (0.19-0.45) |
| Docosapentaenoic acid (DPA), 22:5n-3                | 0.85 $\pm$ 0.44 (0.12-3.86) | 0.77 (0.54-1.05) |
| Docosahexaenoic acid (DHA), 22:6n-3                 | 2.44 $\pm$ 1.51 (0.40-12.5) | 2.05 (1.49-2.91) |
| <b>trans Fat</b>                                    | 13.0 $\pm$ 5.59 (0.82-45.7) | 12.2 (8.83-16.2) |
| <i>trans</i> -7-hexadecenoic acid, 16:1n-9 <i>t</i> | 0.89 $\pm$ 0.48 (0.11-4.19) | 0.80 (0.54-1.11) |
| Palmitelaidic acid, 16:1n-7 <i>t</i>                | 0.86 $\pm$ 0.35 (0.13-3.14) | 0.81 (0.61-1.06) |
| Sum of 18:1n-10-12 <i>t</i> isomers*                | 0.71 $\pm$ 0.37 (0.03-3.57) | 0.64 (0.45-0.87) |
| Elaidic acid, 18:1n-9                               | 6.51 $\pm$ 2.94 (0.20-23.0) | 6.09 (4.35-8.15) |
| <i>trans</i> -Vaccenic acid, 18:1n-7 <i>t</i>       | 2.72 $\pm$ 1.21 (0.12-8.72) | 2.53 (1.87-3.40) |
| Linelaidic acid, 18:2 <i>t</i> <sup>†</sup>         | 0.23 $\pm$ 0.19 (0.01-2.61) | 0.18 (0.10-0.30) |
| Conjugated linoleic acid, 18:2CLA                   | 1.05 $\pm$ 0.75 (0.07-6.34) | 0.84 (0.49-1.40) |

Values are presented as mean  $\pm$  SD (Range) and median (interquartile range). \*18:1n-10-12*t*, sum of 18:1n-10, n-11, and n-12 *trans* isomers; <sup>†</sup>18:2*t*, sum of all 18:2 *trans* isomers.

**Table S2.** Prospective association of serum individual non-esterified fatty acid (NEFA) with incident stroke in the Cardiovascular Health Study cohort, 1996-1997

| NEFA,<br>umol/L | Model 1*                          |                 | Model 2†                          |                 | Model 3‡                          |                 |
|-----------------|-----------------------------------|-----------------|-----------------------------------|-----------------|-----------------------------------|-----------------|
|                 | Hazard ratio<br>(95% CI)          | <i>P</i> -value | Hazard ratio<br>(95% CI)          | <i>P</i> -value | Hazard ratio<br>(95% CI)          | <i>P</i> -value |
| <b>SFA</b>      |                                   |                 |                                   |                 |                                   |                 |
| 12:0            | 0.92<br>(0.80-1.06)               | 0.25            | 0.92<br>(0.80-1.07)               | 0.29            | 0.92<br>(0.80-1.07)               | 0.29            |
| 14:0            | 0.95<br>(0.63-1.43)               | 0.81            | 0.97<br>(0.64-1.48)               | 0.90            | 0.93<br>(0.61-1.41)               | 0.73            |
| 15:0            | 1.24<br>(0.90-1.72)               | 0.19            | 1.24<br>(0.89-1.73)               | 0.20            | 1.30<br>(0.93-1.82)               | 0.13            |
| 16:0            | 1.29<br>(0.89-1.86)               | 0.18            | 1.33<br>(0.90-1.96)               | 0.15            | 1.30<br>(0.88-1.91)               | 0.19            |
| 18:0            | 0.87<br>(0.66-1.14)               | 0.31            | 0.85<br>(0.65-1.12)               | 0.25            | 0.85<br>(0.65-1.11)               | 0.23            |
| <b>20:0</b>     | <b>1.17</b><br><b>(0.98-1.40)</b> | <b>0.09</b>     | <b>1.18</b><br><b>(0.99-1.41)</b> | <b>0.07</b>     | <b>1.21</b><br><b>(1.01-1.44)</b> | <b>0.04</b>     |
| 22:0            | 1.04<br>(0.91-1.18)               | 0.57            | 1.07<br>(0.94-1.21)               | 0.32            | 1.05<br>(0.92-1.20)               | 0.43            |
| 24:0            | 0.97<br>(0.81-1.16)               | 0.73            | 0.99<br>(0.85-1.14)               | 0.85            | 0.97<br>(0.84-1.14)               | 0.75            |
| <b>MUFA</b>     |                                   |                 |                                   |                 |                                   |                 |
| 14:1n-5         | 0.89<br>(0.63-1.26)               | 0.51            | 0.87<br>(0.61-1.23)               | 0.42            | 0.87<br>(0.62-1.24)               | 0.45            |
| <b>16:1n-9</b>  | <b>0.71</b><br><b>(0.50-1.02)</b> | <b>0.06</b>     | <b>0.67</b><br><b>(0.47-0.97)</b> | <b>0.03</b>     | <b>0.68</b><br><b>(0.47-0.98)</b> | <b>0.04</b>     |
| 16:1n-7         | 1.13<br>(0.73-1.73)               | 0.59            | 1.16<br>(0.74-1.81)               | 0.53            | 1.21<br>(0.77-1.89)               | 0.41            |
| 18:1n-9         | 0.80<br>(0.42-1.52)               | 0.50            | 0.91<br>(0.48-1.72)               | 0.77            | 0.92<br>(0.48-1.76)               | 0.79            |
| 18:1n-7         | 1.22<br>(0.76-1.97)               | 0.41            | 1.15<br>(0.70-1.89)               | 0.57            | 1.10<br>(0.67-1.81)               | 0.71            |
| 20:1n-9         | 1.20<br>(0.88-1.63)               | 0.25            | 1.14<br>(0.83-1.56)               | 0.42            | 1.14<br>(0.83-1.57)               | 0.42            |
| 22:1n-9         | 0.95<br>(0.83-1.08)               | 0.42            | 0.96<br>(0.85-1.09)               | 0.56            | 0.96<br>(0.85-1.10)               | 0.57            |
| 24:1n-9         | 1.03<br>(0.93-1.15)               | 0.56            | 1.02<br>(0.91-1.15)               | 0.68            | 1.00<br>(0.88-1.14)               | 0.94            |
| <b>n-6 PUFA</b> |                                   |                 |                                   |                 |                                   |                 |
| 18:2n-6         | 1.27<br>(0.85-1.91)               | 0.25            | 1.22<br>(0.81-1.83)               | 0.33            | 1.20<br>(0.80-1.81)               | 0.39            |
| 18:3n-6         | 1.05<br>(0.90-1.23)               | 0.52            | 1.06<br>(0.90-1.25)               | 0.47            | 1.04<br>(0.89-1.23)               | 0.61            |
| 20:2n-6         | 1.05<br>(0.89-1.24)               | 0.55            | 1.06<br>(0.90-1.25)               | 0.49            | 1.08<br>(0.91-1.27)               | 0.41            |

|                          |                                   |             |                                   |             |                                   |             |
|--------------------------|-----------------------------------|-------------|-----------------------------------|-------------|-----------------------------------|-------------|
| <b>20:3n-6</b>           | <b>1.28</b><br><b>(1.01-1.61)</b> | <b>0.04</b> | <b>1.29</b><br><b>(1.02-1.63)</b> | <b>0.04</b> | <b>1.28</b><br><b>(1.01-1.62)</b> | <b>0.04</b> |
| <b>20:4n-6</b>           | <b>0.82</b><br><b>(0.66-1.01)</b> | <b>0.06</b> | <b>0.81</b><br><b>(0.65-1.00)</b> | <b>0.05</b> | <b>0.83</b><br><b>(0.67-1.02)</b> | <b>0.08</b> |
| 22:4n-6                  | 0.94<br>(0.81-1.09)               | 0.42        | 0.95<br>(0.82-1.10)               | 0.51        | 0.94<br>(0.80-1.10)               | 0.43        |
| 22:5n-6                  | 0.95<br>(0.80-1.12)               | 0.53        | 0.95<br>(0.80-1.14)               | 0.60        | 0.98<br>(0.82-1.17)               | 0.79        |
| <b>n-3 PUFA</b>          |                                   |             |                                   |             |                                   |             |
| 18:3n-3                  | 0.90<br>(0.69-1.19)               | 0.47        | 0.96<br>(0.73-1.26)               | 0.78        | 0.96<br>(0.73-1.26)               | 0.77        |
| 18:4n-3                  | 1.05<br>(0.91-1.21)               | 0.48        | 1.07<br>(0.93-1.24)               | 0.36        | 1.08<br>(0.93-1.25)               | 0.29        |
| 20:5n-3                  | 0.94<br>(0.75-1.17)               | 0.59        | 0.96<br>(0.77-1.20)               | 0.70        | 0.97<br>(0.78-1.21)               | 0.80        |
| 22:5n-3                  | 0.90<br>(0.68-1.20)               | 0.49        | 0.92<br>(0.69-1.24)               | 0.60        | 0.92<br>(0.69-1.24)               | 0.60        |
| 22:6n-3                  | 0.88<br>(0.71-1.10)               | 0.28        | 0.87<br>(0.70-1.09)               | 0.22        | 0.84<br>(0.68-1.04)               | 0.11        |
| <b>trans FA</b>          |                                   |             |                                   |             |                                   |             |
| 16:1n-9T                 | 1.28<br>(0.92-1.76)               | 0.14        | 1.27<br>(0.91-1.78)               | 0.16        | 1.31<br>(0.93-1.83)               | 0.12        |
| 16:1n-7T                 | 0.77<br>(0.56-1.06)               | 0.11        | 0.77<br>(0.56-1.07)               | 0.12        | 0.77<br>(0.55-1.07)               | 0.12        |
| 18:1n10-12T <sup>§</sup> | 1.15<br>(0.82-1.61)               | 0.42        | 1.10<br>(0.78-1.55)               | 0.58        | 1.09<br>(0.77-1.54)               | 0.62        |
| 18:1n-9T                 | 0.78<br>(0.57-1.07)               | 0.12        | 0.77<br>(0.56-1.07)               | 0.12        | 0.79<br>(0.57-1.09)               | 0.14        |
| 18:1n-7T                 | 0.92<br>(0.67-1.26)               | 0.60        | 0.91<br>(0.66-1.26)               | 0.58        | 0.92<br>(0.67-1.27)               | 0.61        |
| 18:2T <sup>  </sup>      | 1.03<br>(0.92-1.15)               | 0.63        | 1.04<br>(0.92-1.17)               | 0.54        | 1.04<br>(0.92-1.18)               | 0.52        |
| 18:2CLA                  | 1.04<br>(0.88-1.23)               | 0.68        | 1.03<br>(0.87-1.22)               | 0.75        | 1.02<br>(0.85-1.21)               | 0.84        |

Hazard ratio estimates are given per 1-SD increment in NEFA. CI, confidence interval. CLA, conjugated linoleic acid. \*Model 1 adjusted for age, sex, race, field center, and all other NEFAs; †Model 2 adjusts for model 1 covariates plus smoking status, education, physical activity, serum albumin, alcohol consumption, cystatin C for estimate glomerular filtration rate, body mass index, aspirin use, and waist circumference; ‡Model 3 adjusts for Model 2 covariates plus hypertension, prevalent diabetes, and total serum cholesterol concentration; §18:1n10-12t, sum of 18:2n-10, n-11, and n-12 *trans* isomers; ||18:2t, sum of all 18:2 *trans* isomers.

**Table S3.** Prospective association of serum individual non-esterified fatty acid (NEFA) with incident stroke, excluding hemorrhagic strokes ( $n=45$ ), in the Cardiovascular Health Study cohort, 1996-1997

| NEFA,<br>umol/L | Model 1*                 |                 | Model 2†                 |                 | Model 3‡                 |                 |
|-----------------|--------------------------|-----------------|--------------------------|-----------------|--------------------------|-----------------|
|                 | Hazard ratio<br>(95% CI) | <i>P</i> -value | Hazard ratio<br>(95% CI) | <i>P</i> -value | Hazard ratio<br>(95% CI) | <i>P</i> -value |
| <b>SFA</b>      |                          |                 |                          |                 |                          |                 |
| 12:0            | 0.94<br>(0.81-1.09)      | 0.41            | 0.94<br>(0.81-1.10)      | 0.44            | 0.94<br>(0.81-1.09)      | 0.42            |
| 14:0            | 1.09<br>(0.69-1.73)      | 0.70            | 1.12<br>(0.70-1.78)      | 0.64            | 1.05<br>(0.66-1.67)      | 0.84            |
| 15:0            | 1.13<br>(0.78-1.63)      | 0.51            | 1.15<br>(0.79-1.68)      | 0.45            | 1.22<br>(0.83-1.79)      | 0.31            |
| 16:0            | 1.17<br>(0.76-1.80)      | 0.46            | 1.20<br>(0.77-1.88)      | 0.42            | 1.16<br>(0.75-1.81)      | 0.51            |
| 18:0            | 0.96<br>(0.71-1.30)      | 0.78            | 0.93<br>(0.69-1.25)      | 0.62            | 0.93<br>(0.69-1.25)      | 0.61            |
| 20:0            | 1.13<br>(0.92-1.38)      | 0.25            | 1.15<br>(0.93-1.41)      | 0.19            | 1.18<br>(0.96-1.45)      | 0.11            |
| 22:0            | 1.02<br>(0.88-1.18)      | 0.79            | 1.06<br>(0.91-1.22)      | 0.46            | 1.03<br>(0.89-1.20)      | 0.67            |
| 24:0            | 1.00<br>(0.87-1.14)      | 0.97            | 1.00<br>(0.89-1.14)      | 0.95            | 0.99<br>(0.87-1.13)      | 0.87            |
| <b>MUFA</b>     |                          |                 |                          |                 |                          |                 |
| 14:1n-5         | 0.91<br>(0.61-1.35)      | 0.63            | 0.88<br>(0.59-1.32)      | 0.54            | 0.89<br>(0.59-1.34)      | 0.58            |
| 16:1n-9         | 0.79<br>(0.54-1.17)      | 0.25            | 0.75<br>(0.51-1.12)      | 0.16            | 0.76<br>(0.51-1.13)      | 0.18            |
| 16:1n-7         | 0.87<br>(0.52-1.45)      | 0.59            | 0.91<br>(0.54-1.55)      | 0.73            | 0.98<br>(0.58-1.65)      | 0.93            |
| 18:1n-9         | 0.72<br>(0.35-1.50)      | 0.38            | 0.85<br>(0.41-1.77)      | 0.67            | 0.85<br>(0.41-1.79)      | 0.68            |
| 18:1n-7         | 1.53<br>(0.89-2.63)      | 0.13            | 1.37<br>(0.77-2.41)      | 0.28            | 1.29<br>(0.73-2.28)      | 0.38            |
| 20:1n-9         | 1.14<br>(0.80-1.64)      | 0.47            | 1.08<br>(0.75-1.56)      | 0.66            | 1.08<br>(0.74-1.57)      | 0.68            |
| 22:1n-9         | 0.90<br>(0.77-1.04)      | 0.16            | 0.93<br>(0.80-1.08)      | 0.32            | 0.93<br>(0.80-1.08)      | 0.33            |
| 24:1n-9         | 1.04<br>(0.93-1.17)      | 0.53            | 1.02<br>(0.89-1.17)      | 0.74            | 1.00<br>(0.86-1.15)      | 0.97            |
| <b>n-6 PUFA</b> |                          |                 |                          |                 |                          |                 |
| 18:2n-6         | 1.27<br>(0.79-2.04)      | 0.32            | 1.18<br>(0.73-1.89)      | 0.50            | 1.18<br>(0.73-1.90)      | 0.50            |
| 18:3n-6         | 1.10<br>(0.93-1.29)      | 0.27            | 1.11<br>(0.93-1.32)      | 0.25            | 1.09<br>(0.91-1.30)      | 0.36            |

|                          |                     |      |                     |      |                     |      |
|--------------------------|---------------------|------|---------------------|------|---------------------|------|
| 20:2n-6                  | 1.05<br>(0.88-1.24) | 0.60 | 1.06<br>(0.90-1.26) | 0.47 | 1.07<br>(0.90-1.28) | 0.44 |
| 20:3n-6                  | 1.24<br>(0.95-1.62) | 0.11 | 1.24<br>(0.95-1.61) | 0.11 | 1.23<br>(0.94-1.60) | 0.12 |
| 20:4n-6                  | 0.82<br>(0.65-1.04) | 0.10 | 0.82<br>(0.65-1.04) | 0.10 | 0.84<br>(0.67-1.07) | 0.15 |
| 22:4n-6                  | 0.92<br>(0.78-1.09) | 0.35 | 0.93<br>(0.78-1.11) | 0.43 | 0.92<br>(0.77-1.10) | 0.36 |
| 22:5n-6                  | 0.92<br>(0.76-1.13) | 0.43 | 0.95<br>(0.78-1.17) | 0.63 | 0.97<br>(0.79-1.19) | 0.78 |
| <b>n-3 PUFA</b>          |                     |      |                     |      |                     |      |
| 18:3n-3                  | 0.81<br>(0.59-1.12) | 0.21 | 0.88<br>(0.64-1.21) | 0.43 | 0.87<br>(0.63-1.21) | 0.42 |
| 18:4n-3                  | 1.10<br>(0.94-1.28) | 0.23 | 1.13<br>(0.96-1.32) | 0.13 | 1.14<br>(0.98-1.33) | 0.10 |
| 20:5n-3                  | 0.96<br>(0.76-1.23) | 0.76 | 0.97<br>(0.76-1.24) | 0.79 | 0.98<br>(0.77-1.25) | 0.86 |
| 22:5n-3                  | 0.97<br>(0.71-1.34) | 0.87 | 0.99<br>(0.72-1.38) | 0.97 | 1.01<br>(0.73-1.39) | 0.97 |
| 22:6n-3                  | 0.85<br>(0.65-1.10) | 0.22 | 0.86<br>(0.66-1.11) | 0.24 | 0.83<br>(0.65-1.05) | 0.12 |
| <b>trans FA</b>          |                     |      |                     |      |                     |      |
| 16:1n-9T                 | 1.25<br>(0.88-1.79) | 0.22 | 1.25<br>(0.86-1.82) | 0.24 | 1.28<br>(0.88-1.87) | 0.20 |
| 16:1n-7T                 | 0.79<br>(0.55-1.13) | 0.19 | 0.77<br>(0.53-1.11) | 0.16 | 0.76<br>(0.52-1.09) | 0.14 |
| 18:1n10-12T <sup>§</sup> | 1.13<br>(0.78-1.64) | 0.50 | 1.07<br>(0.73-1.55) | 0.74 | 1.06<br>(0.73-1.55) | 0.74 |
| 18:1n-9T                 | 0.80<br>(0.57-1.14) | 0.22 | 0.80<br>(0.56-1.15) | 0.23 | 0.81<br>(0.57-1.16) | 0.25 |
| 18:1n-7T                 | 0.88<br>(0.62-1.26) | 0.48 | 0.90<br>(0.63-1.29) | 0.56 | 0.91<br>(0.64-1.31) | 0.62 |
| 18:2T <sup>  </sup>      | 1.08<br>(0.96-1.21) | 0.20 | 1.08<br>(0.96-1.23) | 0.20 | 1.09<br>(0.96-1.24) | 0.18 |
| 18:2CLA                  | 1.06<br>(0.88-1.28) | 0.52 | 1.04<br>(0.86-1.26) | 0.69 | 1.03<br>(0.85-1.25) | 0.78 |

Hazard ratio estimates are given per 1-SD increment in NEFA. CI, confidence interval. CLA, conjugated linoleic acid. \*Model 1 adjusted for age, sex, race, field center, and all other NEFAs; †Model 2 adjusts for model 1 covariates plus smoking status, education, physical activity, serum albumin, alcohol consumption, cystatin C for estimate glomerular filtration rate, body mass index, aspirin use, and waist circumference; ‡Model 3 adjusts for Model 2 covariates plus hypertension, prevalent diabetes, and total serum cholesterol concentration; §18:1n10-12t, sum of 18:2n-10, n-11, and n-12 *trans* isomers; ||18:2t, sum of all 18:2 *trans* isomers.

**Table S4.** Multicollinearity assessment using comparison of standard errors of hazard ratio estimates from individual NEFA models and a single model including all NEFAs (excluding 14:1, 18:1n-7, and 16:1n-7)

| NEFA,<br>umol/L | Individual NEFA models |                           | Multiple NEFA model |                          | SE ratio <sup>†</sup> |
|-----------------|------------------------|---------------------------|---------------------|--------------------------|-----------------------|
|                 | SE                     | Hazard ratio*<br>(95% CI) | SE                  | Hazard ratio<br>(95% CI) |                       |
| <b>SFA</b>      |                        |                           |                     |                          |                       |
| 12:0            | 0.06                   | 0.97<br>(0.86-1.09)       | 0.07                | 0.92<br>(0.80-1.06)      | 1.18                  |
| 15:0            | 0.06                   | 1.07<br>(0.95-1.20)       | 0.15                | 1.18<br>(0.88-1.57)      | 2.54                  |
| 16:0            | 0.06                   | 1.13<br>(1.01-1.27)       | 0.17                | 1.41<br>(1.02-1.95)      | 2.83                  |
| 18:0            | 0.05                   | 1.08<br>(0.98-1.20)       | 0.13                | 0.82<br>(0.63-1.06)      | 2.46                  |
| 20:0            | 0.05                   | 1.14<br>(1.04-1.26)       | 0.09                | 1.21<br>(1.02-1.43)      | 1.77                  |
| 22:0            | 0.05                   | 1.11<br>(1.01-1.21)       | 0.06                | 1.06<br>(0.94-1.21)      | 1.39                  |
| 24:0            | 0.07                   | 0.99<br>(0.87-1.12)       | 0.08                | 0.98<br>(0.84-1.14)      | 1.20                  |
| <b>MUFA</b>     |                        |                           |                     |                          |                       |
| 14:1n-5         | 0.06                   | 1.03<br>(0.92-1.16)       | 0.12                | 0.96<br>(0.75-1.22)      | 2.00                  |
| 16:1n-9         | 0.06                   | 1.07<br>(0.95-1.20)       | 0.18                | 0.69<br>(0.48-0.98)      | 3.07                  |
| 18:1n-9         | 0.06                   | 1.12<br>(0.99-1.25)       | 0.29                | 1.09<br>(0.62-1.92)      | 4.81                  |
| 20:1n-9         | 0.06                   | 1.14<br>(1.02-1.28)       | 0.16                | 1.14<br>(0.84-1.56)      | 2.72                  |
| 22:1n-9         | 0.05                   | 1.05<br>(0.94-1.16)       | 0.07                | 0.96<br>(0.85-1.09)      | 1.26                  |
| 24:1n-9         | 0.05                   | 1.05<br>(0.95-1.16)       | 0.06                | 1.03<br>(0.91-1.15)      | 1.17                  |
| <b>n-6 PUFA</b> |                        |                           |                     |                          |                       |
| 18:2n-6         | 0.06                   | 1.12<br>(1.00-1.26)       | 0.20                | 1.14<br>(0.77-1.69)      | 3.40                  |
| 18:3n-6         | 0.06                   | 1.08<br>(0.97-1.21)       | 0.08                | 1.06<br>(0.90-1.24)      | 1.43                  |
| 20:2n-6         | 0.05                   | 1.10<br>(1.00-1.20)       | 0.08                | 1.07<br>(0.91-1.26)      | 1.79                  |
| 20:3n-6         | 0.05                   | 1.06<br>(0.97-1.17)       | 0.12                | 1.33<br>(1.06-1.67)      | 2.40                  |
| 20:4n-6         | 0.06                   | 1.00<br>(0.90-1.11)       | 0.11                | 0.81<br>(0.66-1.01)      | 1.97                  |
| 22:4n-6         | 0.06                   | 1.01                      | 0.08                | 0.95                     | 1.36                  |



|                          |      |      |             |      |             |      |
|--------------------------|------|------|-------------|------|-------------|------|
|                          |      |      | (0.91-1.13) |      | (0.82-1.11) |      |
| 22:5n-6                  | 0.05 | 1.05 |             | 0.09 | 0.96        | 1.67 |
|                          |      |      | (0.94-1.16) |      | (0.81-1.15) |      |
| <b>n-3 PUFA</b>          |      |      |             |      |             |      |
| 18:3n-3                  | 0.06 | 1.07 |             | 0.13 | 0.98        | 2.23 |
|                          |      |      | (0.95-1.20) |      | (0.75-1.27) |      |
| 18:4n-3                  | 0.06 | 1.03 |             | 0.07 | 1.07        | 1.26 |
|                          |      |      | (0.92-1.15) |      | (0.93-1.24) |      |
| 20:5n-3                  | 0.06 | 0.96 |             | 0.11 | 0.96        | 1.89 |
|                          |      |      | (0.85-1.08) |      | (0.76-1.19) |      |
| 22:5n-3                  | 0.06 | 1.00 |             | 0.15 | 0.93        | 2.50 |
|                          |      |      | (0.89-1.12) |      | (0.69-1.24) |      |
| 22:6n-3                  | 0.06 | 0.96 |             | 0.11 | 0.88        | 1.92 |
|                          |      |      | (0.85-1.07) |      | (0.71-1.10) |      |
| <b>trans FA</b>          |      |      |             |      |             |      |
| 16:1n-9T                 | 0.06 | 1.06 |             | 0.17 | 1.29        | 2.79 |
|                          |      |      | (0.94-1.20) |      | (0.92-1.80) |      |
| 16:1n-7T                 | 0.06 | 1.01 |             | 0.17 | 0.77        | 2.77 |
|                          |      |      | (0.90-1.14) |      | (0.55-1.06) |      |
| 18:1n10-12T <sup>‡</sup> | 0.06 | 1.06 |             | 0.17 | 1.11        | 2.98 |
|                          |      |      | (0.94-1.18) |      | (0.79-1.56) |      |
| 18:1n-9T                 | 0.06 | 0.99 |             | 0.16 | 0.78        | 2.72 |
|                          |      |      | (0.88-1.11) |      | (0.57-1.07) |      |
| 18:1n-7T                 | 0.06 | 1.00 |             | 0.16 | 0.88        | 2.71 |
|                          |      |      | (0.89-1.12) |      | (0.64-1.20) |      |
| 18:2T <sup>§</sup>       | 0.05 | 1.05 |             | 0.06 | 1.04        | 1.15 |
|                          |      |      | (0.95-1.16) |      | (0.92-1.17) |      |
| 18:2CLA                  | 0.06 | 1.08 |             | 0.09 | 1.04        | 1.51 |
|                          |      |      | (0.96-1.21) |      | (0.87-1.23) |      |

Hazard ratio estimates are given per 1-SD increment in NEFA.; CI, confidence interval. CLA, conjugated linoleic acid. SE, standard error. \*, all models adjust for age, sex, race, field center, smoking status, education, physical activity, serum albumin, alcohol consumption, cystatin C for estimate glomerular filtration rate, body mass index, aspirin use, and waist circumference. <sup>†</sup>SE ratio, multiple NEFA model standard error divided by individual NEFA model standard error; <sup>‡</sup>, 18:1n10-12T, sum of 18:2n-10, n-11, and n-12 *trans* isomers; <sup>§</sup>, 18:2t, sum of all 18:2 *trans* isomers.

**Table S5.** Exploration of potential mediation by homeostatic model assessment of insulin resistance (HOMA-IR) in the association of serum non-esterified fatty acid (NEFA) sub-classes with incident stroke in the Cardiovascular Health Study cohort, 1996-1997

| Sub-classes<br>of NEFA,<br>umol/L | Model 1*                 |         | Model 2†                 |         | Model 3‡                 |         |
|-----------------------------------|--------------------------|---------|--------------------------|---------|--------------------------|---------|
|                                   | Hazard ratio<br>(95% CI) | P-value | Hazard ratio<br>(95% CI) | P-value | Hazard ratio<br>(95% CI) | P-value |
| n-6 PUFA                          | 1.32<br>(1.01-1.72)      | 0.04    | 1.32<br>(1.01-1.73)      | 0.04    | 1.33<br>(1.02-1.74)      | 0.04    |
| n-3 PUFA                          | 0.73<br>(0.58-0.91)      | 0.01    | 0.77<br>(0.61-0.97)      | 0.02    | 0.77<br>(0.61-0.97)      | 0.03    |
| Total <i>trans</i>                | 0.90<br>(0.76-1.07)      | 0.23    | 0.85<br>(0.71-1.01)      | 0.07    | 0.85<br>(0.71-1.01)      | 0.07    |

Hazard ratio estimates are given per 1-SD increment in NEFA sub-class. CI, confidence interval.

\*Model 1 adjusted for age, sex, race, field center, and all other NEFA sub-classes; †Model 2 adjusts for model 1 covariates plus smoking status, education, physical activity, serum albumin, alcohol consumption, cystatin C for estimate glomerular filtration rate, body mass index, aspirin use, and waist circumference; ‡Model 3 adjusts for Model 2 covariates plus HOMA-IR.

**Table S6.** Exploration of potential mediation by homeostatic model assessment of insulin resistance (HOMA-IR) in the association of selected serum individual non-esterified fatty acid (NEFA) with incident stroke in the Cardiovascular Health Study cohort, 1996-1997

| NEFA,<br>umol/L per<br>SD | Model 1*                 |                 | Model 2†                 |                 | Model 3‡                 |                 |
|---------------------------|--------------------------|-----------------|--------------------------|-----------------|--------------------------|-----------------|
|                           | Hazard ratio<br>(95% CI) | <i>P</i> -value | Hazard ratio<br>(95% CI) | <i>P</i> -value | Hazard ratio<br>(95% CI) | <i>P</i> -value |
| 20:0                      | 1.17<br>(0.98-1.40)      | 0.09            | 1.18<br>(0.99-1.41)      | 0.07            | 1.18<br>(0.99-1.42)      | 0.07            |
| 16:1n-9                   | 0.71<br>(0.50-1.02)      | 0.06            | 0.67<br>(0.47-0.97)      | 0.03            | 0.67<br>(0.46-0.96)      | 0.03            |
| 20:3n-6                   | 1.28<br>(1.01-1.61)      | 0.04            | 1.29<br>(1.02-1.63)      | 0.04            | 1.28<br>(1.01-1.62)      | 0.04            |
| 20:4n-6                   | 0.82<br>(0.66-1.01)      | 0.06            | 0.81<br>(0.65-1.00)      | 0.05            | 0.81<br>(0.66-1.01)      | 0.06            |

Hazard ratio estimates are given per 1-SD increment in NEFA. CI, confidence interval. \*Model 1 adjusted for age, sex, race, field center, and all other NEFAs; †Model 2 adjusts for model 1 covariates plus smoking status, education, physical activity, serum albumin, alcohol consumption, cystatin C for estimate glomerular filtration rate, body mass index, aspirin use, and waist circumference; ‡Model 3 adjusts for Model 2 covariates plus HOMA-IR.

**Table S7.** Principal component analysis of non-esterified fatty acids associated with incident stroke in the CHS participants

| FAs                                   | PC <sup>§</sup> 1 | PC 2    | PC 3    | PC 4    | PC 5    | PC 6    | PC 7    |
|---------------------------------------|-------------------|---------|---------|---------|---------|---------|---------|
| 12:0                                  |                   |         |         |         | -0.4817 |         |         |
| 14:0                                  | 0.2084            |         |         | 0.2511  |         |         |         |
| 15:0                                  | 0.2036            |         |         | 0.2740  |         |         |         |
| 16:0                                  | 0.2312            |         |         |         |         |         |         |
| 18:0                                  |                   |         | 0.2649  | 0.2152  |         |         |         |
| 20:0                                  |                   | 0.2571  | 0.3328  | 0.3822  |         |         |         |
| 22:0                                  |                   | 0.2528  | 0.3296  | 0.2469  |         |         |         |
| 24:0                                  |                   |         |         |         |         | 0.3001  | 0.8645  |
| 14:1n-5                               |                   |         | -0.2892 | 0.2515  |         |         |         |
| 16:1n-7                               | 0.2084            |         | -0.2678 |         |         |         |         |
| 16:1n-9                               | 0.2242            |         |         |         |         |         |         |
| 18:1n-7                               | 0.2349            |         |         |         |         |         |         |
| 18:1n-9                               | 0.2384            |         |         |         |         |         |         |
| 20:1n-9                               | 0.2044            |         |         |         | 0.2493  |         |         |
| 22:1n-9                               |                   |         |         | 0.2380  | 0.5043  |         |         |
| 24:1n-9                               |                   |         |         |         | 0.2818  | 0.5126  | -0.2726 |
| 18:2n-6                               | 0.2235            |         |         |         |         |         |         |
| 18:3n-6                               |                   |         |         |         |         |         |         |
| 20:2n-6                               |                   |         |         |         | 0.2366  |         |         |
| 20:3n-6                               |                   | 0.3200  |         |         |         |         |         |
| 20:4n-6                               |                   | 0.3374  |         |         |         |         |         |
| 22:4n-6                               |                   |         |         |         |         | -0.3572 | 0.2445  |
| 22:5n-6                               |                   |         |         |         |         |         |         |
| 18:3n-3                               |                   |         |         |         | 0.2033  |         |         |
| 18:4n-3                               |                   | -0.2068 |         |         |         |         |         |
| 20:5n-3                               |                   | 0.3620  |         |         |         |         |         |
| 22:5n-3                               |                   | 0.2220  |         |         |         |         |         |
| 22:6n-3                               |                   | 0.3342  |         | -0.2521 |         |         |         |
| 16:1n-7 <sub>t</sub>                  | 0.2183            |         |         |         |         |         |         |
| 16:1n-9 <sub>t</sub>                  |                   | -0.2028 |         |         |         |         |         |
| 18:1n-10-12 <sub>t</sub> <sup>*</sup> |                   | -0.2168 | 0.2478  |         |         |         |         |
| 18:1n-7 <sub>t</sub>                  |                   |         | 0.3412  |         |         |         |         |
| 18:1n-9 <sub>t</sub>                  |                   | -0.2192 | 0.2823  |         |         |         |         |
| 18:2 <sub>t</sub> <sup>†</sup>        |                   |         |         | 0.2374  |         | -0.5544 |         |
| 18:2-CLA <sup>‡</sup>                 |                   |         |         |         |         |         |         |

Principal component analysis retained 7 components with eigenvalues >1, and the data presented above were the loadings of the components greater than 0.2. <sup>\*</sup>18:1n-10-12<sub>t</sub>, sum of 18:1n-10, n-11, and n-12 trans isomers; <sup>†</sup>18:2<sub>t</sub>, sum of all 18:2 *trans* isomers; <sup>‡</sup>CLA, conjugated linoleic acid; <sup>§</sup>PC, principal component.

**Table S8.** Principal component analysis of all 35 NEFAs with incident stroke in the Cardiovascular Health Study cohort, 1996-1997

|             | Model 1 <sup>‡</sup>    |                 | Model 2 <sup>§</sup>    |                 | Model 3 <sup>  </sup>   |                 |
|-------------|-------------------------|-----------------|-------------------------|-----------------|-------------------------|-----------------|
|             | HR <sup>†</sup> (95%CI) | <i>P</i> -value | HR (95%CI)              | <i>P</i> -value | HR (95%CI)              | <i>P</i> -value |
| PC* 1       | 1.01 (0.98-1.04)        | 0.373           | 1.02 (0.99-1.05)        | 0.142           | 1.01 (0.99-1.05)        | 0.199           |
| PC 2        | 0.98 (0.93-1.04)        | 0.569           | 1.01 (0.95-1.07)        | 0.864           | 0.99 (0.94-1.06)        | 0.943           |
| PC 3        | 1.03 (0.96-1.12)        | 0.414           | 1.02 (0.94-1.10)        | 0.699           | 1.03 (0.95-1.12)        | 0.477           |
| <b>PC 4</b> | 1.08 (0.99-1.18)        | 0.067           | <b>1.10 (1.01-1.20)</b> | <b>0.025</b>    | <b>1.11 (1.02-1.21)</b> | <b>0.019</b>    |
| PC 5        | 1.06 (0.96-1.16)        | 0.282           | 1.07 (0.97-1.19)        | 0.161           | 1.05 (0.96-1.16)        | 0.292           |
| PC 6        | 0.95 (0.85-1.06)        | 0.341           | 0.96 (0.85-1.07)        | 0.442           | 0.95 (0.84-1.07)        | 0.365           |
| PC 7        | 0.87 (0.72-1.05)        | 0.133           | 0.92 (0.77-1.10)        | 0.339           | 0.90 (0.75-1.09)        | 0.279           |

Values are hazard ratio (95% confidence interval). \*PC, principal component; †HR, hazard ratio; ‡Model 1 adjusted for age, sex, race, and field center; §Model 2 adjusts for model 1 covariates plus smoking status, education, physical activity, serum albumin, alcohol consumption, cystatin C for estimate glomerular filtration rate, body mass index, aspirin use, and waist circumference; ||Model 3 adjusts for Model 2 covariates plus hypertension, prevalent diabetes, and serum total cholesterol concentration.
